# Supplementary material for: Highly electrically conductive polyethylenedioxythiophene thin films for thermoelectric applications
Source: Royal Society of Chemistry journal article supplement (doi:10.1039/c6ta04122a), 2016-01-01
Supplement: c6ta04122a1.pdf [file c6ta04122a1.pdf]

## **Electronic Support Information**

### **Highly Electrical Conductive Polyethylenedioxythiophene Thin Films for Thermoelectrics Applications**

Chao Yi,<sup>1</sup> Long Zhang,<sup>1</sup> Rundong Hu,<sup>2</sup> Steven S. C. Chuang,<sup>1</sup> Jie Zheng,<sup>2</sup> and Xiong Gong<sup>\*1</sup>

1) College of Polymer Science and Polymer Engineering, The University of Akron, Akron, OH  
44325

2) Department of Chemical & Biomolecular Engineering, The University of Akron, Akron,  
OH 44325

\* Corresponding author, Email: [xgong@uakron.edu](mailto:xgong@uakron.edu); Fax: (330) 972-3406

## 1. Fitting of X-ray photoemission spectroscopy (XPS)

Fitting of XPS spectra of the PP-modified PEDOT:Tos thin films with and without protonic acids treatment are processed on XPSPEAK41 developed by Dr. Raymond W.M. Kwok in the Department of Chemistry, The Chinese University of Hong Kong. The fitting processes are under following routes: the spin-split core levels feature originating from the sulfurs ( $S^*$ ) in PEDOT chain have peaks from 160-164 eV, then, the contributions from  $S^*$  in the doped PEDOT chains are labelled as  $S^1 p$ , which have spin-split signals from  $S^1 p_{1/2}$  and  $S^1 p_{3/2}$ . The signals from  $S^*$  in the neutral PEDOT chains are labelled as  $S^2 p$ , which also have spin-split signals from  $S^2 p_{1/2}$  and  $S^2 p_{3/2}$ . The spin-split peak to peak distance (s. o. s) is set to 1.0 eV and the full width at half maximum (FWHM) is set to 0.85 eV. The spin-split signals from sulfonate group in  $Tos^-$  are labelled as  $S^3 p$ . The spin-split signals from sulfonate group in  $HTos^-$  are labelled as  $S^4 p$ . The s.o.s and FWHM are set to 1.2 eV and 1.2 eV. And the spin-split signals from sulfonate group in the  $SO_4^{2-}$  and  $HSO_4^-$  are labelled as  $S^5 p$  and  $S^6 p$ , correspondingly. The s. o. s and FWHM are also set to 1.2 eV and 1.2 eV, respectively. Then, the spin-split signals from  $Cl^-$ ,  $HCl$ ,  $ClO_4^-$  and  $HClO_4^-$  are assigned as  $Cl^1 p$ ,  $Cl^2 p$ ,  $Cl^3 p$  and  $Cl^4 p$ , respectively. The s. o. s and FWHM of  $Cl^1$  and  $Cl^2$  are set to 1.65 eV and 1.2 eV, respectively. The s. o. s and FWHM of  $Cl^3$  and  $Cl^4$  are set to 1.67 eV and 1.2 eV, respectively. By calculating the area under the fitted curves from the above assigned elements, the ratios between acid counter-ions, acid ions and  $S^*$  in the PEDOT chains could be calculated. Then the doping level of the PEDOT chain could be estimated by these ratios. The fitted XPS spectra and raw XPS spectra of the PP-modified PEDOT:Tos thin films are shown in Fig. S1.

## 2. Reduced thin film thickness

The XPS spectra of  $O_{1s}$  observed from the PP-modified PEDOT:Tos thin films with and without protonic acids treatment are shown in Fig. S2. Shifts of  $O_{1s}$  signals (O atom in the main chain of PP) are observed when the PP-modified PEDOT:Tos thin films are treated with various protonic acids. As discussed in the manuscript, for the PP-modified PEDOT:Tos thin treated with HCl,  $Tos^-$  is replaced by  $Cl^-$ . Moreover, only  $HCl^-$  is introduced into the thin film. Thus, the  $O_{1s}$  peaks from the PP-modified PEDOT:Tos thin film treated with HCl are only attributed to the O atom in the PEDOT chains; by another way, it suggests that the electrically insulating PP is completely removed. Thus, the reduced film thickness after HCl treatment is originated from the removal of the PP. The thickness of the PP-modified PEDOT:Tos thin film without protonic acid treatment is  $165 \pm 5$  nm. The thickness of the PP-modified PEDOT:Tos thin films treated with HCl are  $130 \pm 5$  nm. Thus, the reduction in the film thickness is due to complete removal of PP. Since the thicknesses of all the PP-modified PEDOT:Tos thin films are reduced from  $165 \pm 5$  nm to  $130 \pm 5$  nm, the PP additives are also completely removed from of the PP-modified PEDOT:Tos thin films treated with other protonic acids.

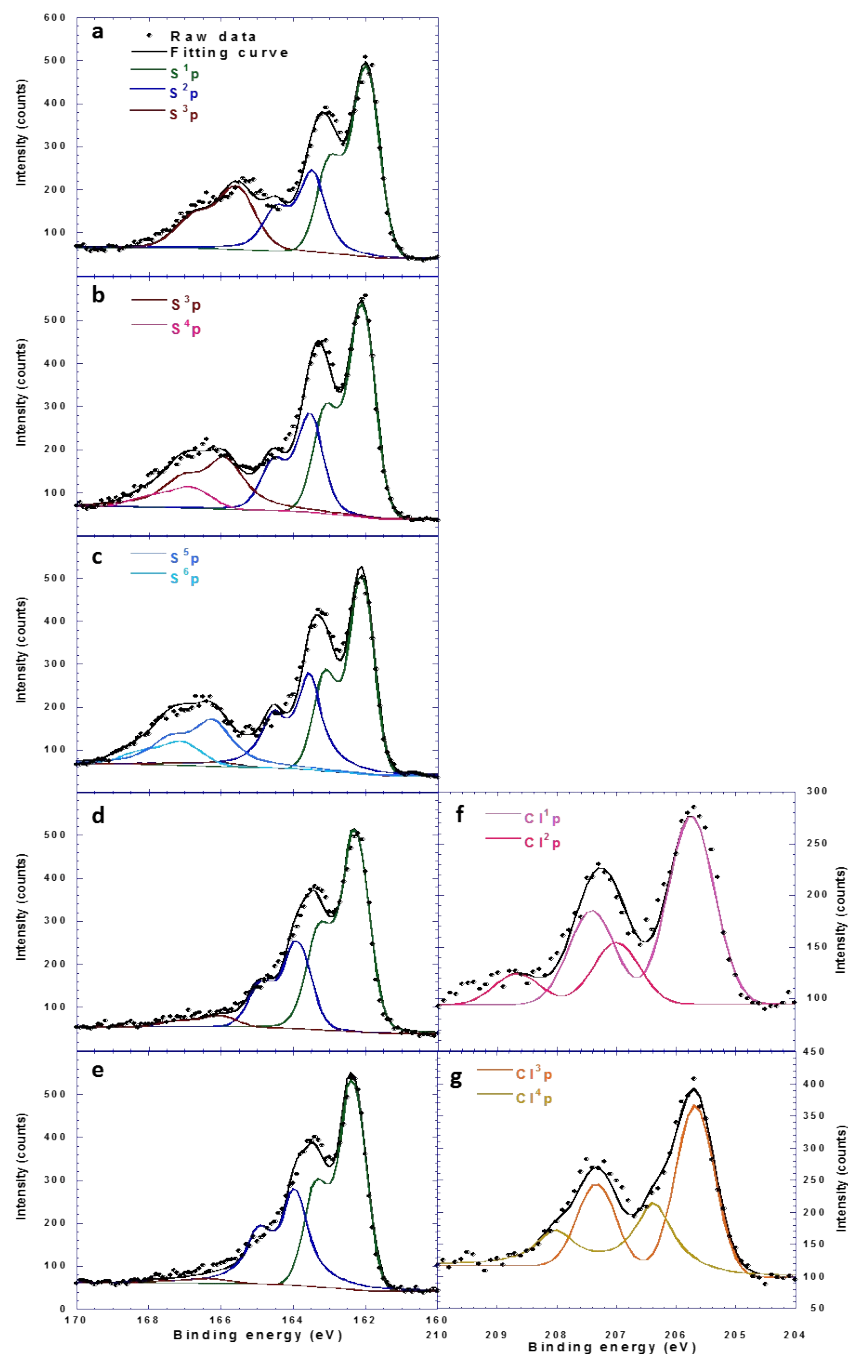

**Fig. S1.** Fitted S<sub>2p</sub> XPS spectra of (a) the PP-modified PEDOT:Tos thin film without protonic acid treatment; and the PP-modified PEDOT:Tos thin films treated with (b) p-tos; (c) H<sub>2</sub>SO<sub>4</sub>; (d) HCl; (e) HClO<sub>4</sub>; Fitted Cl<sub>2p</sub> XPS spectra of the PP modified PEDOT:Tos thin films treated with (f) HCl and (g) HClO<sub>4</sub>.

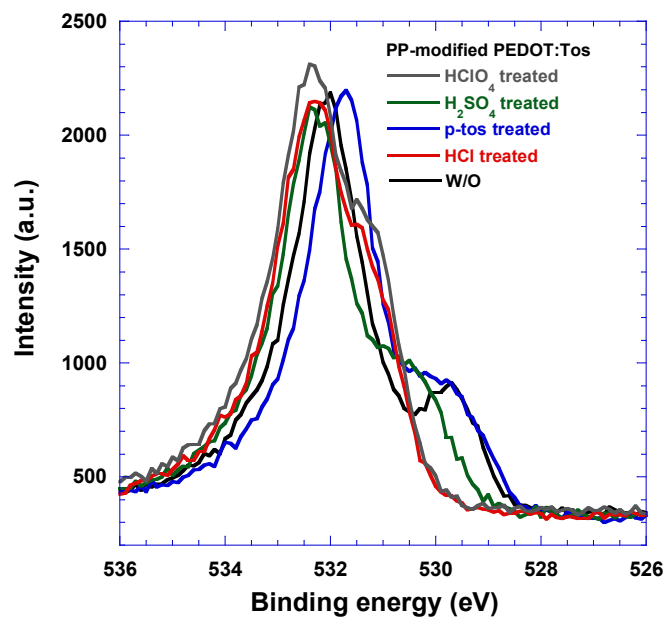

**Fig. S2.** High resolution XPS spectra of O<sub>1s</sub> observed from the PP-modified PEDOT:Tos thin films with and without (W/O) protonic acids treatment.
